# Supplementary material for: O-Benzylated-calix[4]arenes as ancillary ligands in organolanthanide chemistry
Source: Royal Society of Chemistry journal article supplement (doi:10.1039/b205200h), 2002-01-01
Supplement: b205200h.doc [file b205200h.doc]

***O*-benzylated-calix[4]arenes as ancillary ligands in organo­lanthanide chemistry**


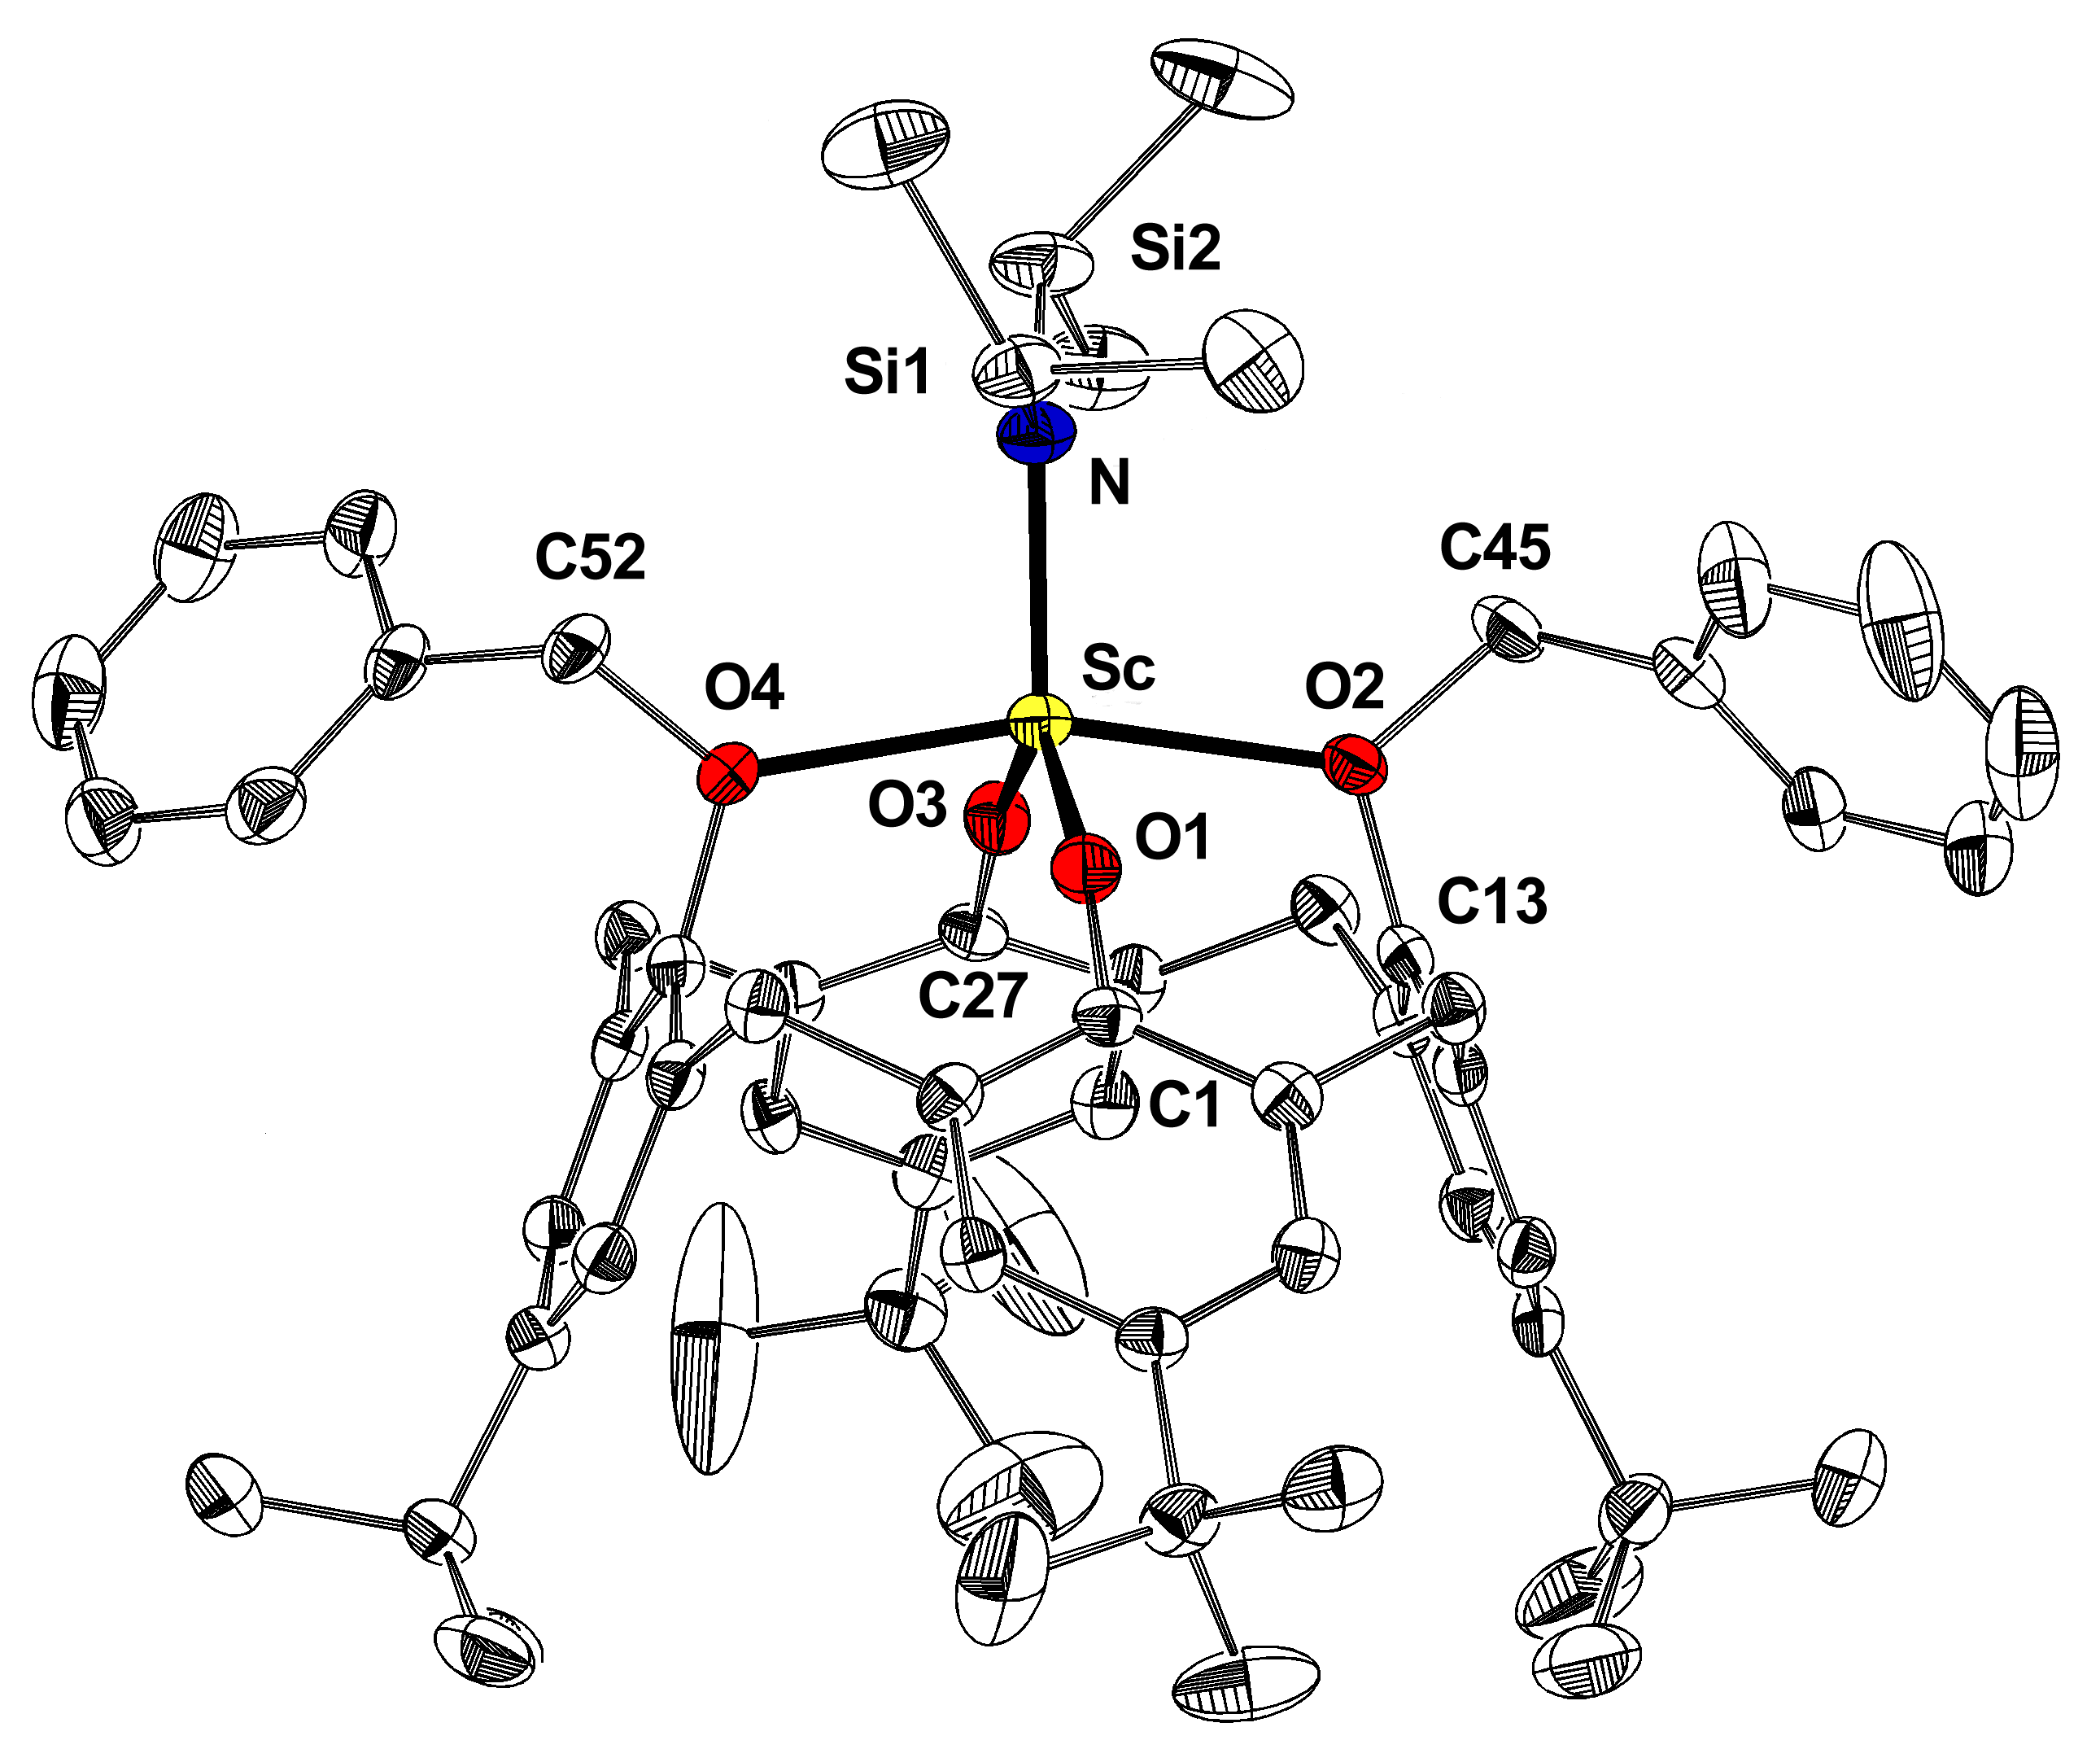

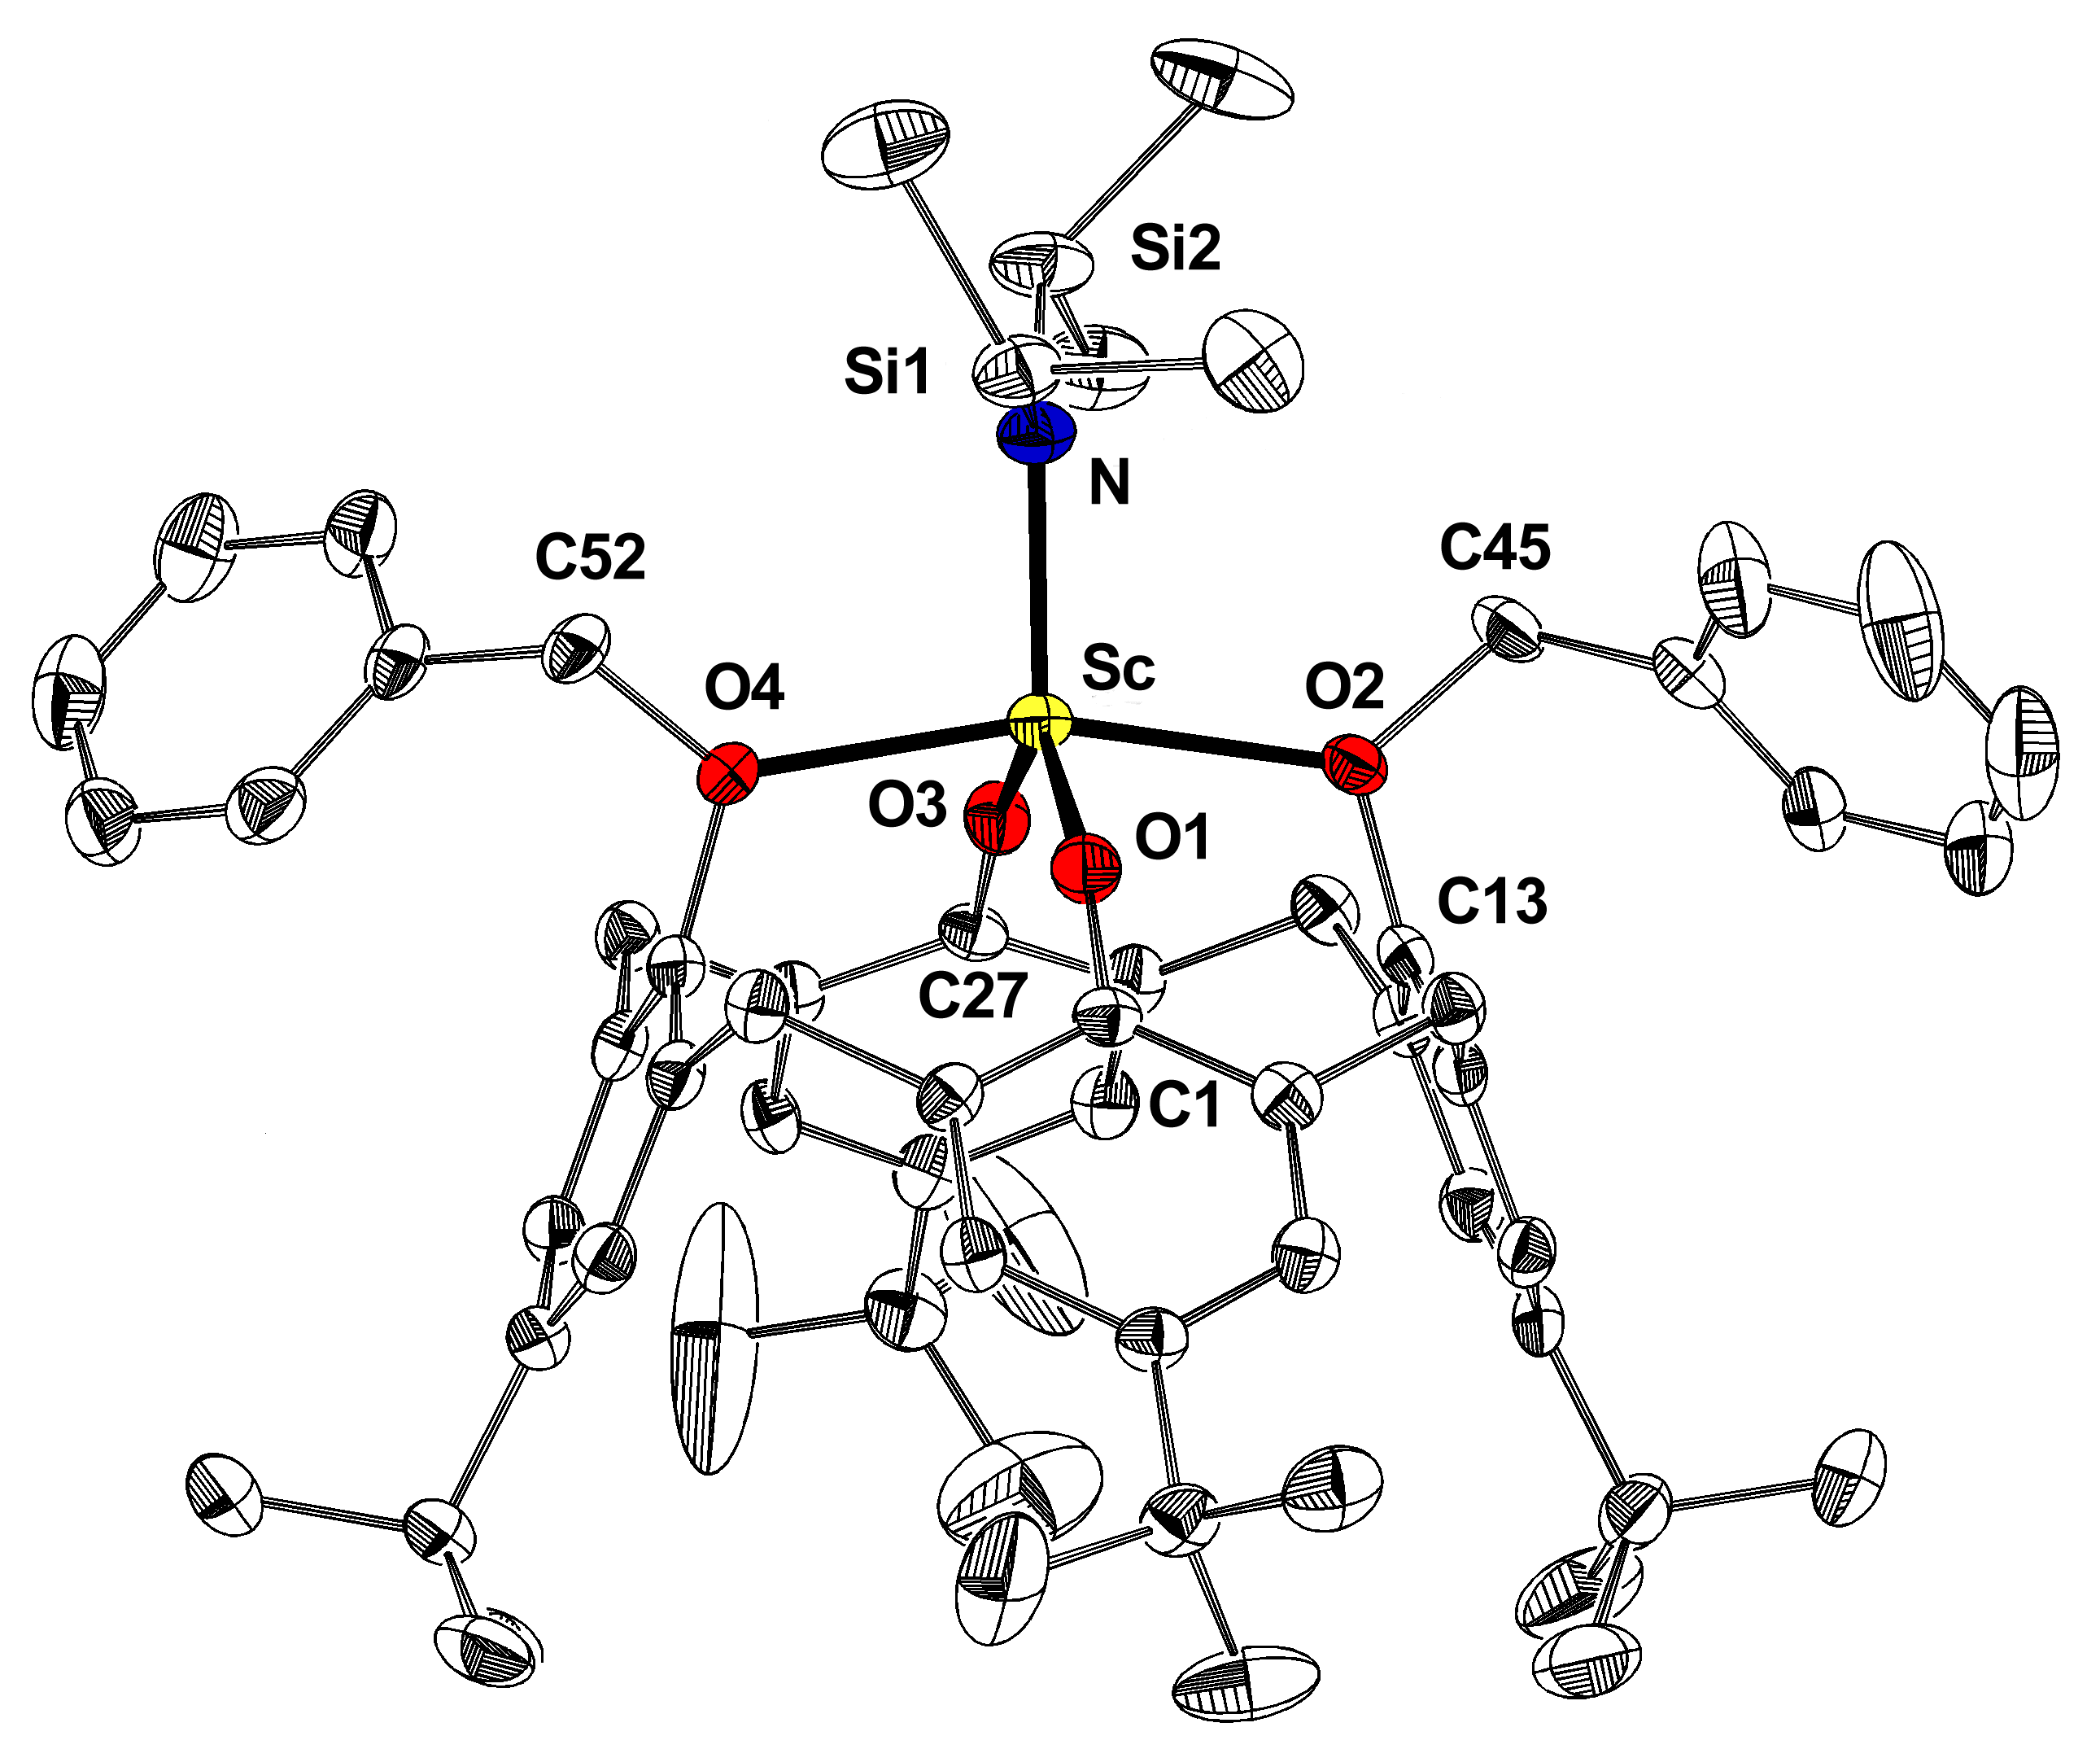
Frank Estler, Eberhardt Herdtweck and Reiner Anwander***

Anorganisch-chemisches Institut der Technischen Universität München, Lichtenbergstraße 4,

D-85747 Garching, Germany. Fax: +49 (0) 289-13473; e-mail: reiner.anwander@ch.tum.de

## Supplementary Information

**Experimental Section**

**General Considerations**. All air- and moisture-sensitive compounds were manipulated with the rigorous exclusion of oxygen and moisture in flame-dried (180 °C) Schlenk-type glassware using standard high-vacuum technique or an argon-filled glovebox (MBraun) with O2/H2O < 1ppm. The solvents were predried, distilled from Na/K alloy and stored in a glovebox. Deuterated solvents were obtained from Deutero GmbH and degassed and dried over Na/K alloy. The lanthanide silylamide precursors Ln[N(SiHMe2)2]3(THF)x (Ln = Sc **2a**, Lu **2b**) were synthesized according to the literature (ref. 1). NMR spectra were recorded either on a Bruker DPX-400 (FT, 400 MHz 1H; 100 MHz 13C) or on a JEOL JNM-GX-270 (FT, 270.16 MHz 1H; 67.93 MHz 13C) spectrometer. 1H and 13C shifts are referenced to internal solvent resonances and reported relative to TMS. IR spectra were recorded on a Perkin-Elmer 1650-FTIR spectrometer as Nujol mulls. Elemental analyses were performed in the microanalytical laboratory of the institute.

*Synthesis of* ***3a***.In a glove box, 360.0 mg (0.44 mmol) of **1a** and 224.0 mg (0.44 mmol) of **2a** were dissolved in 10 mL of *n*-hexane. The solution was stirred for 24 h at room temperature. The resulting solid was separated and washed with 10 mL of *n*-hexane, then dissolved in a minimum amount of toluene and kept at –30 °C over night affording 380.0 mg (0.38 mmol, 86 %) of **3a** as colorless crystals. 1H NMR (d6-benzene, 23 °C, 400.1 MHz): 7.1 – 6.7 (m, 18H, Ar-*H*), 5.79 (sp, 2H, Si-*H*), 5.64 (s, 4H, O*CH2*Ph), 4.30 (d, 4H, *CH2*), 2.93 (d, 4H, *CH2*), 1.41 (s, 18H, C*(CH3)3*), 0.77 (d, 12H, SiH*(CH3)2*), 0.71 (s, 18H, C*(CH3)3*). 13C NMR (d6-benzene, 23 °C, 100.6 MHz): 157.4, 148.5, 145.8, 139.6, 137.5, 133.6, 131.7, 128.9, 128.2, 126.4, 125.3, 124.0 (Ar-*C*), 81.8 (O*CH2*Ph), 33.8 (*CH2*), 33.4 (C(CH3)3) 31.9 (C(CH3)3), 30,3 (C(CH3)3), 21.0 (C(CH3)3), 3.3 (SiH*(CH3)2*). IR (Nujol mull) ν = 2083 cm-1 s (Si-*H*). Found: C, 78.6; H, 8.9, N, 1.4. C62H80NO4Si2Sc requires C, 78.4; H, 8.6, N, 1.2 %.

*Synthesis of* ***3b***.According to the procedure for **3a**, 449.2 mg (0.40 mmol, 90 %) of **3b** were obtained from 366.4 mg (0.44 mmol) of **1a** and 316.5 mg (0.44 mmol) of **2b** as a white powder. 1H NMR (d6-benzene, 23 °C, 400.1 MHz): 7.3 – 6.7 (m, 18H, Ar-*H*), 5.71 (sp, 2H, Si-*H*), 5.44 (s, 4H, O*CH2*Ph), 4.19 (d, 4H, *CH2*), 2.93 (d, 4H, *CH2*), 1.42 (s, 18H, C*(CH3)3*), 0.75 (s, 18H, C*(CH3)3*), 0.71 (d, 12H, SiH*(CH3)2*). 13C NMR (d6-benzene, 23 °C, 100.6 MHz): 158.3, 148.8, 146.0, 138.7, 134.3, 133.5, 131.7, 129.8, 129.2, 127.0, 125.6, 124.2 (Ar-*C*), 82.2 (O*CH2*Ph), 34.1 (*CH2*), 33.8 (C*(CH3)3*) 32.3 (C*(CH3)3*), 30,7 (C*(CH3)3*), 21.4 (C*(CH3)3*), 3.7 (SiH*(CH3)2*). IR (nujol mull) ν = 2052 cm-1 s (Si-*H*). Found: C, 66.4; H, 7.6 N, 1.37. C62H80NO4Si2Lu requires C, 65.6; H, 7.1, N, 1.23 %.

*Synthesis of* ***4***.In a glove box, 207.9 mg (0.34 mmol) of **1b** and 246.2.0 mg (0.34 mmol) of **2b** were dissolved in 15 mL of toluene. The solution was stirred for 24 h at room temperature. Then, the volatiles were removed under reduced pressure. The resulting white powder was dissolved in a minimum amount of toluene and kept at –30 °C over night yielding 278.5 mg (0.31 mmol, 90 %) of **4** as colorless crystals. 1H NMR (d6-benzene, 23 °C, 400.1 MHz): 7.3 – 7.0 (m, 10H, OCH2Ph-*H*), 6.81 (dd, 2H, Ar-*H*), 6.65 (d, 4H, Ar-*H*), 6.18 (dd, 2H, Ar-*H*), 5.74 (sp, 2H, Si-*H*), 5.49 (s, 4H, O*CH2*Ph), 4.19 (d, 4H, *CH2*), 2.93 (d, 4H, *CH2*), 0.75 (d, 12H, SiH*(CH3)2*). 13C NMR (d6-benzene, 23 °C, 100.6 MHz): 160.7, 148.1, 137.8, 136.9, 134.5, 131.6, 130.7, 129.9, 129.3, 127.0, 125.6, 116.6 (Ar-*C*), 82.5 (O*CH2*Ph), 32.8 (*CH2*), 3.6 (SiH*(CH3)2*). IR (nujol mull) ν = 2053 cm-1 s (Si-*H*). Found: C, 61.4; H, 5.6, N, 1.4. C46H48NO4Si2Lu requires C, 60.7; H, 5.3, N, 1.5 %.

**Additional references.**

1 R. Anwander, O. Runte, J. Eppinger, G. Gerstberger, E. Herdtweck, M. Spiegler, *J. Chem. Soc., Dalton Trans.* 1998, 847.
